# Supplementary material for: Molecularly imprinted films of acrylonitrile/methyl methacrylate/acrylic acid terpolymers: influence of methyl methacrylate in the binding performance of l-ephedrine imprinted films
Source: Royal Society of Chemistry journal article supplement (doi:10.1039/c3ob40332g), 2013-01-01
Supplement: c3ob40332g.pdf [file c3ob40332g.pdf]

**Molecularly imprinted films of acrylonitrile/methyl methacrylate/acrylic acid terpolymers:  
Influence of methyl methacrylate in the binding performance of *L*-ephedrine imprinted films**

Carrie Brisbane<sup>1,2</sup>, Adam McCluskey<sup>1</sup>, Michael Bowyer<sup>2</sup>, Clovia I. Holdsworth<sup>1\*</sup>

<sup>1</sup> Discipline of Chemistry, School of Environmental and Life Sciences, University of Newcastle, Callaghan, NSW 2308 Australia

<sup>2</sup> Discipline of Applied Sciences, School of Environmental and Life Sciences, University of Newcastle, Ourimbah, NSW 2258 Australia

<sup>3</sup> Current Address: Chemical Analysis, 110 Merindale Drive, Croydon, VIC 3136 Australia

Fax: +612 49215472; Tel: +612 9215481; E-mail: [Clovia.Holdsworth@newcastle.edu.au](mailto:Clovia.Holdsworth@newcastle.edu.au)

**Electronic Supplementary Information**

**Table S1.** Monomer feed (mole %) used for copolymer synthesis.

| Polymer   | AN   | AA   | MMA  | MA   | EMA  | nBMA |
|-----------|------|------|------|------|------|------|
| PAMA1     | 42.5 | 15.0 | 42.5 |      |      |      |
| PAMA2     | 50.0 | 7.5  | 42.5 |      |      |      |
| PAMA3     | 42.5 | 7.5  | 50.0 |      |      |      |
| PAMA4     | 28.0 | 15.0 | 57.0 |      |      |      |
| PAMA5     | 57.0 | 15.0 | 28.0 |      |      |      |
| PAMA6     | 42.5 | 22.5 | 35.0 |      |      |      |
| PA-MA-A   | 50.0 | 7.5  |      | 42.5 |      |      |
| PA-EMA-A  | 50.0 | 7.5  |      |      | 42.5 |      |
| PA-nBMA-A | 50.0 | 7.5  |      |      |      | 42.5 |

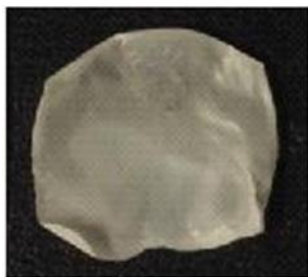

**Figure S1.** An example of a PAMA film obtained from polymer PAMA3 (44% AN, 49% MMA, 7% AA) by phase inversion from acetone to water.

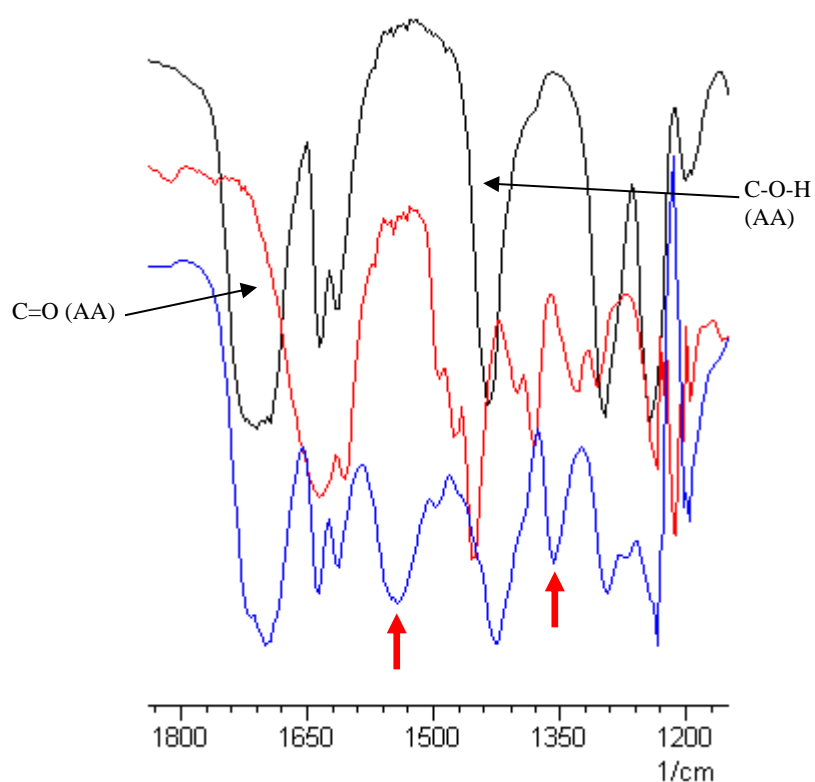

**Figure S2.** FTIR spectra of: AA (black); EPD (red); and a 3:1 AA-EPD complex (blue). Bold red arrows signal emergence of new peaks in the AA-EPD complex. AA produces two peaks of particular interest, the carbonyl stretching peak at  $1710\text{cm}^{-1}$ , and the C-O-H bending peak at  $\sim 1420\text{cm}^{-1}$  shifted to  $1550\text{cm}^{-1}$  and  $1350\text{cm}^{-1}$ , respectively when AA hydrogen bonds with EPD.

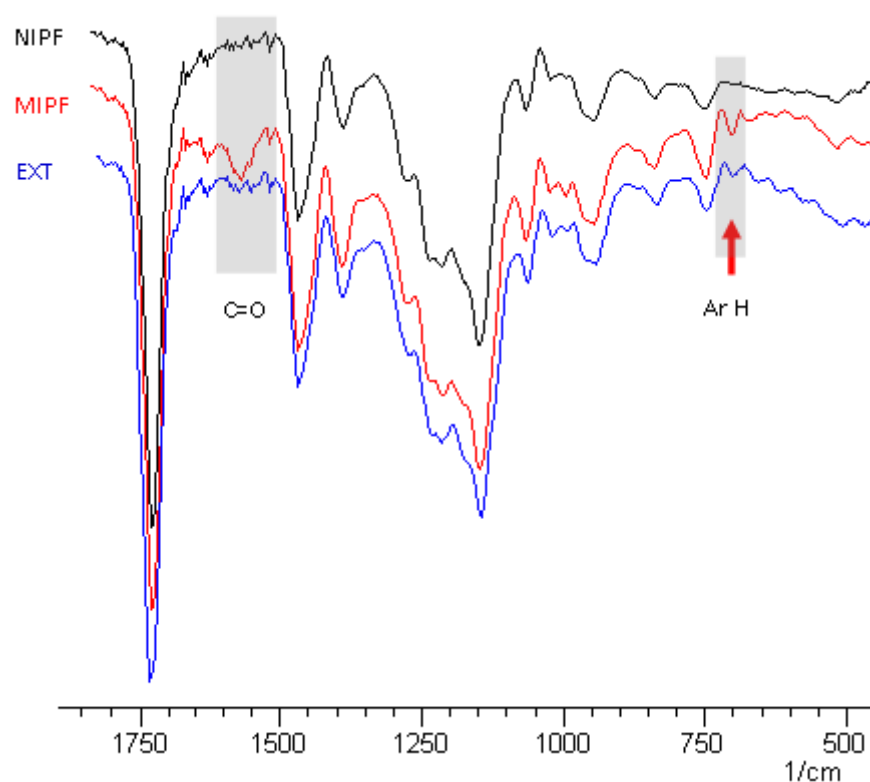

**Figure S3.** FTIR spectra of a) NIPF, b) MIPF and c.) extracted MIPF of Polymer PA-*n*BMA-A. Note that the  $700\text{cm}^{-1}$  peak (EPD arene C-H bending) was still visible following the extraction process while the carboxylate peak at  $1570\text{cm}^{-1}$  has disappeared indicating that the interaction between AA and EPD has been disrupted but EPD is still trapped in the matrix.

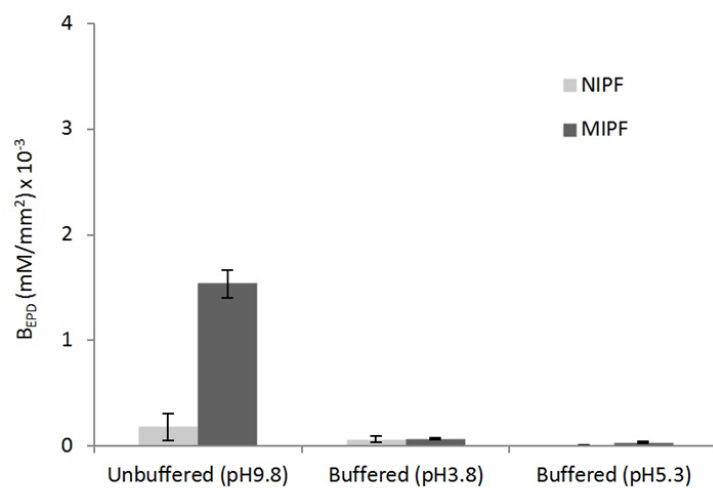

**Figure S4.** EPD rebinding of PAMA2 at various pH values after 2h of contact with 1.0 mL of 1.0 mM EPD solution.

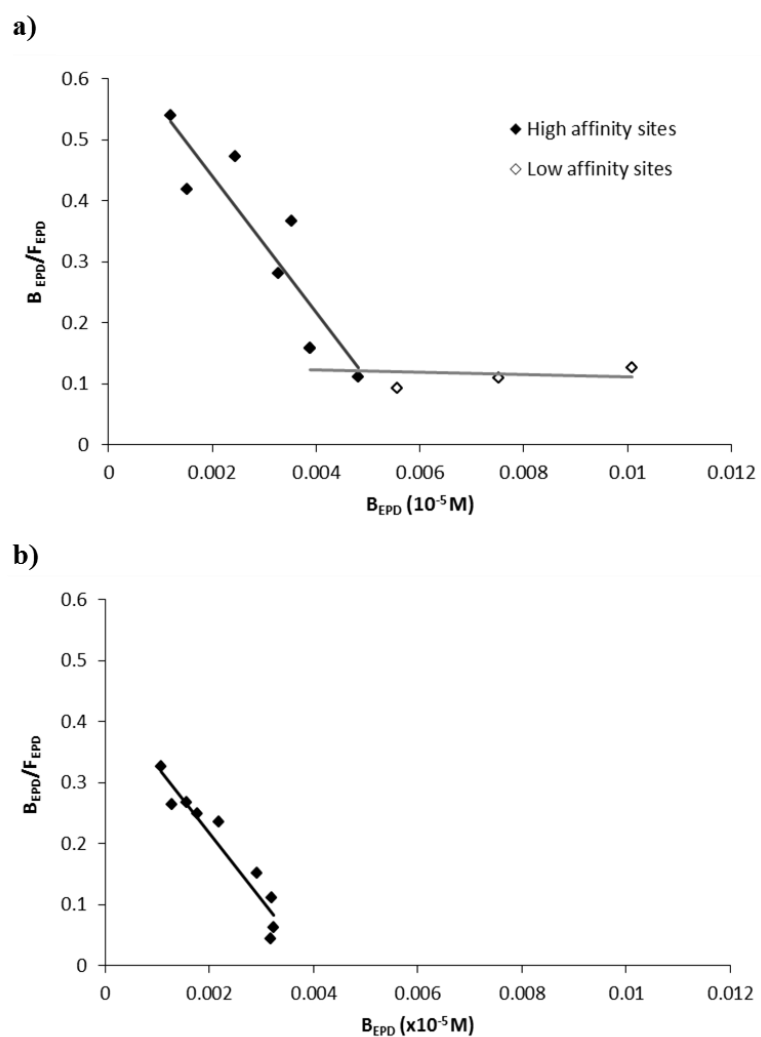

**Figure S5.** Scatchard plots for (a) MIPF<sub>PAMA1</sub> and (b) MIPF<sub>PAMA2</sub> measured after two hours from various concentrations of EPD solutions. Results are an average of three trials. **B** refers to bound EPD, **F** refers to free unbound EPD.
